# Supplementary material for: Impact of Pharmacist-Led Implementation of a Community Hospital-Based Outpatient Parenteral Antimicrobial Therapy on Clinical Outcomes in Thailand
Source: MDPI journal article supplement (doi:10.3390/antibiotics11060760), 2022-06-02
Supplement: s1 [file s1]

## Supplementary Materials

Table S1. The causative organisms in the pre-implementation and post-implementation groups.

| Pathogens                             | Pre-implementation            | Post-implementation           |
|---------------------------------------|-------------------------------|-------------------------------|
| Bacterial culture — no. (%)           | ( <i>n</i> = 50 participants) | ( <i>n</i> = 50 participants) |
| Patients with culture negative status | 26 (52)                       | 22 (44)                       |
| Patients with culture positive status | 24 (48)                       | 28 (56)                       |
| Gram strain — no. (%)                 | ( <i>n</i> = 26 isolates)     | ( <i>n</i> = 32 isolates)     |
| Gram negative bacteria                | 22 (84.6)                     | 27 (84.4)                     |
| Gram positive bacteria                | 4 (15.4)                      | 5 (15.6)                      |
| Causative organisms — no. (%)         | ( <i>n</i> = 26 isolates)     | ( <i>n</i> = 32 isolates)     |
| <i>Escherichia coli</i>               | 1 (3.8)                       | 11 (34.4)                     |
| <i>Klebsiella pneumoniae</i>          | 7 (26.9)                      | 2 (6.3)                       |
| <i>Klebsiella ozonae</i>              | 1 (3.8)                       | 1 (3.1)                       |
| <i>Acinetobacter baumannii</i>        | 5 (19.2)                      | 6 (18.8)                      |
| <i>Acinetobacter lwoffii</i>          | 0 (0)                         | 2 (6.3)                       |
| <i>Pseudomonas aeruginosa</i>         | 2 (7.7)                       | 3 (9.4)                       |
| <i>Stenotrophomonas maltophilia</i>   | 2 (7.7)                       | 0 (0)                         |
| <i>Acromobacter</i> spp.              | 2 (7.7)                       | 0 (0)                         |
| <i>Proteus</i> spp.                   | 2 (7.7)                       | 1 (3.1)                       |
| <i>Enterobacter cloacae</i>           | 0 (0)                         | 1 (3.1)                       |
| <i>Staphylococcus aureus</i>          | 2 (7.7)                       | 3 (9.4)                       |
| <i>Staphylococcus haemolyticus</i>    | 1 (3.8)                       | 1 (3.1)                       |
| Viridans group streptococci           | 0 (0)                         | 1 (3.1)                       |
| <i>Enterococcus faecalis</i>          | 1 (3.8)                       | 0 (0)                         |

Abbreviations: CRAB, carbapenem-resistant *A. baumannii*; ESBL, extended-spectrum beta-lactamase; MDR, multidrug resistance; MRSA, methicillin-resistant *S. aureus*; MSSA, methicillin-susceptible *S. aureus*.
